# Supplementary material for: Defect properties and solution energies of dopants in NASICON-type LiGe2(PO4)3 solid electrolyte: a first-principles study
Source: Royal Society of Chemistry journal article supplement (doi:10.1039/d3cp02165c), 2023-01-01
Supplement: d3cp02165c1.pdf [file d3cp02165c1.pdf]

## Supplementary Informations

### Defect Properties and Solution Energies of Dopants in NASICON-Type $\text{LiGe}_2(\text{PO}_4)_3$ Solid Electrolyte: A First-Principles Study

Anurup Das<sup>1,2</sup>, Madhumita Goswami<sup>1,2</sup> and P.S. Ghosh<sup>1,2,\*</sup>

<sup>1</sup>Glass & Advanced Materials Division, Bhabha Atomic Research Centre, Mumbai 400085, India

<sup>2</sup>Homi Bhabha National Institute, Anushaktinagar, Mumbai 400094, India

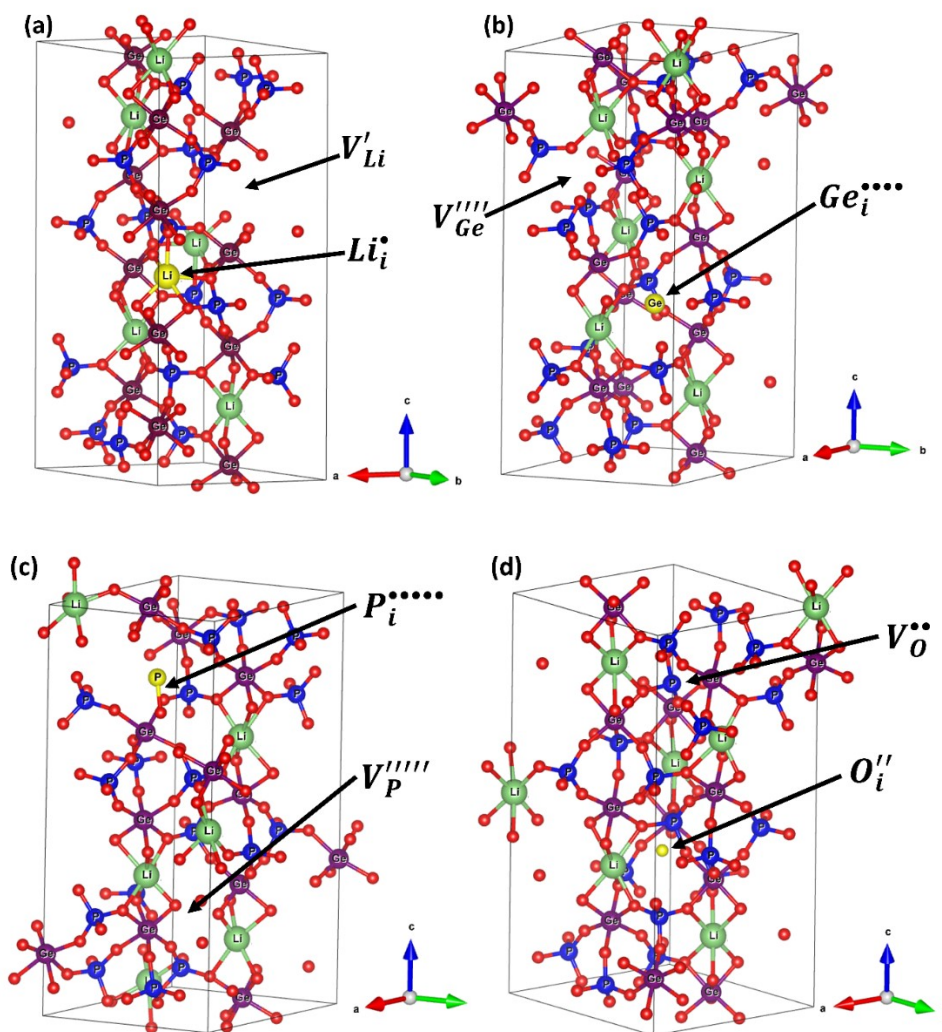

Fig. S11: Optimized unit cell of LGP containing different kinds of Frenkel defects

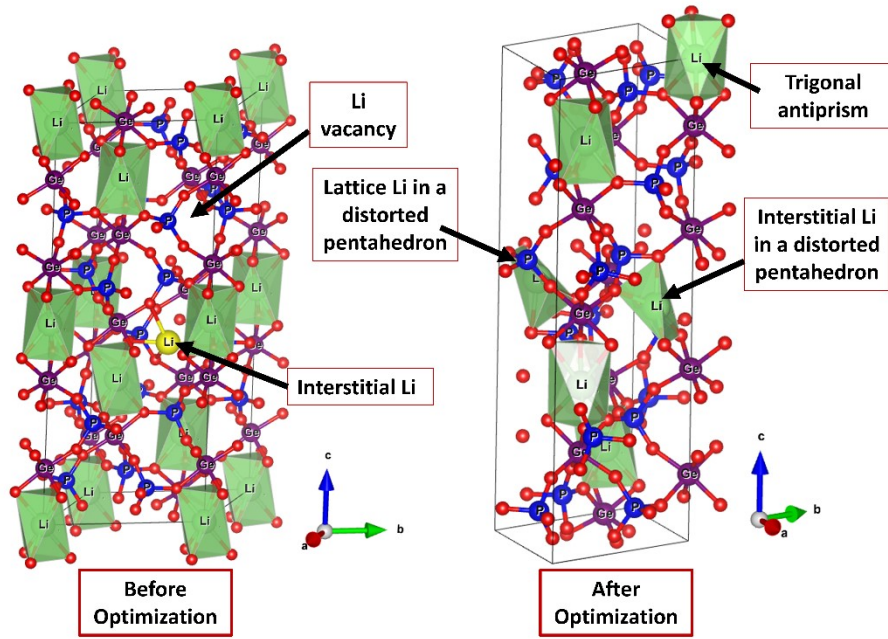

Fig. S12: Close observation on the structure with Li Frenkel defect

Table S11: Defects formation energies (eV/defect) reported previously

|                                                        |           |                                                                        |     |
|--------------------------------------------------------|-----------|------------------------------------------------------------------------|-----|
| Li–TM antisite defects (at 1000 K)                     |           | Li <sub>12</sub> TM <sub>12</sub> O <sub>24</sub>                      | [1] |
| Li–Ni antisite defect concentration                    | 12.9%     | DFT calculations                                                       |     |
| Li–Co antisite defect concentration                    | 0.002%    |                                                                        |     |
| Li Frenkel pairs                                       | ~2 eV     | Anti-perovskite                                                        | [2] |
| LiCl Schottky pair                                     | 1.41 eV   | Li <sub>3</sub> OCl                                                    |     |
| Li <sub>2</sub> O Schottky pair                        | 1.60 eV   | DFT calculations                                                       |     |
| Li interstitial with a substitutional O on the Cl site | 1.67 eV   |                                                                        |     |
| Li Frenkel                                             | 0.76      | NASICON-type                                                           | [3] |
| Li <sub>2</sub> O Schottky                             | 3.59      | LiTi <sub>2</sub> (PO <sub>4</sub> ) <sub>3</sub>                      |     |
|                                                        |           | Classical MD                                                           |     |
| Li Frenkel                                             | 0.75      | NASICON-type                                                           | [4] |
| Ge/P antisite (isolated)                               | 2.01      | LiGe <sub>2</sub> (PO <sub>4</sub> ) <sub>3</sub>                      |     |
| Ge/P antisite (cluster)                                | 1.26      | Classical MD                                                           |     |
| Li <sub>2</sub> O Schottky                             | 3.10      |                                                                        |     |
| Li Frenkel                                             | < 1 eV    | Garnet-type                                                            | [5] |
| Li/La antisite (cluster)                               |           | Li <sub>7</sub> La <sub>3</sub> Zr <sub>2</sub> O <sub>12</sub>        |     |
| Li <sub>2</sub> O Schottky                             |           | DFT                                                                    |     |
| Li Frenkel                                             | 3.73      | DFT/classical MD                                                       | [6] |
| Li <sub>2</sub> O Schottky                             | 9.20      | LiNi <sub>1/3</sub> Mn <sub>1/3</sub> Co <sub>1/3</sub> O <sub>2</sub> |     |
| Li/M antisite                                          | 0.84 (Ni) |                                                                        |     |
| Li Frenkel                                             | 1.76      | LiMn <sub>2</sub> O <sub>4</sub>                                       | [7] |
| Li Frenkel                                             | 2.15      | LiFePO <sub>4</sub>                                                    | [8] |
| Li <sub>2</sub> O Schottky                             | 6.33      |                                                                        |     |

|                            |      |                                                 |      |
|----------------------------|------|-------------------------------------------------|------|
| Li/M antisite              | 1.13 |                                                 |      |
| Li Frenkel                 | 1.97 | LiMnPO <sub>4</sub>                             | [9]  |
| Li <sub>2</sub> O Schottky | 7.36 |                                                 |      |
| Li/M antisite              | 1.48 |                                                 |      |
| Li Frenkel                 | 1.21 | Li <sub>2</sub> FeP <sub>2</sub> O <sub>7</sub> | [10] |
| Li/M antisite              | 0.22 |                                                 |      |

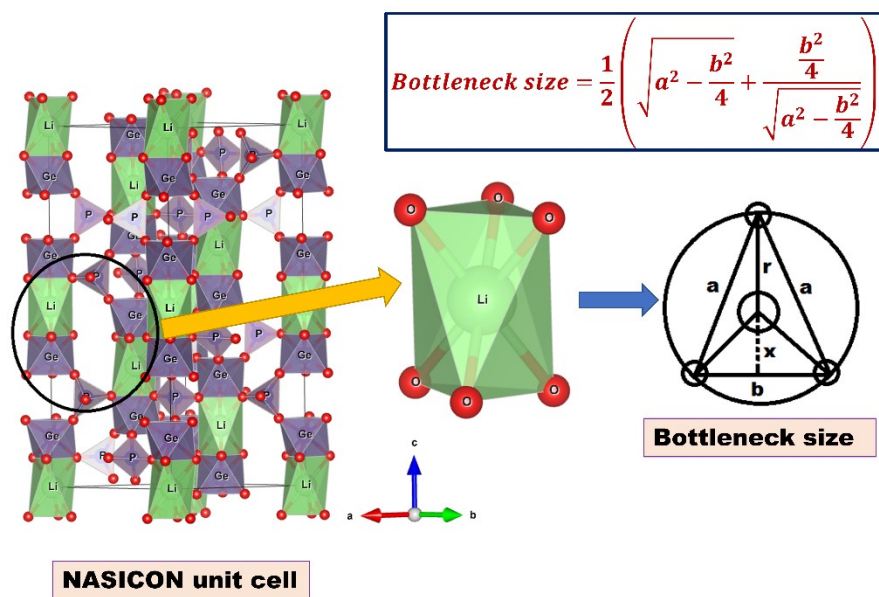

Fig. SI3: A schematic description of the bottleneck size calculation

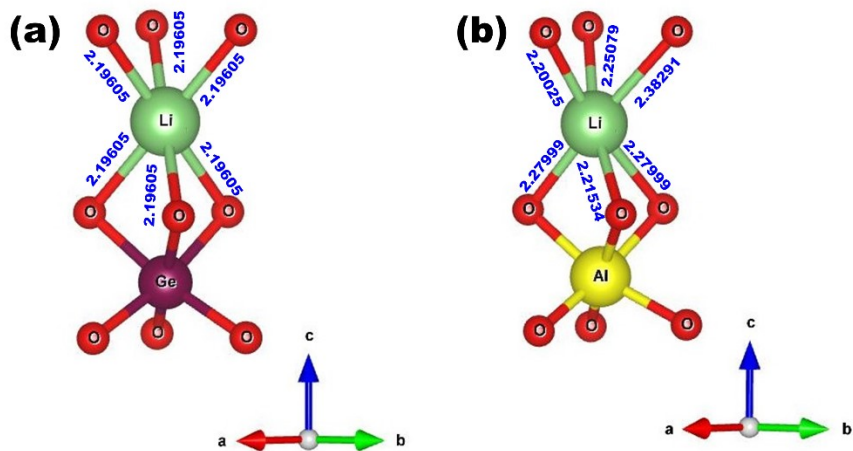

Fig. S14:  $\text{LiO}_6$  and  $\text{Ge/AlO}_6$  polyhedra taken from optimized unit cell of (a) before and (b) after substitution of  $\text{Al}^{3+}$  at  $\text{Ge}^{4+}$  position. The values of Li-O bond lengths are shown.

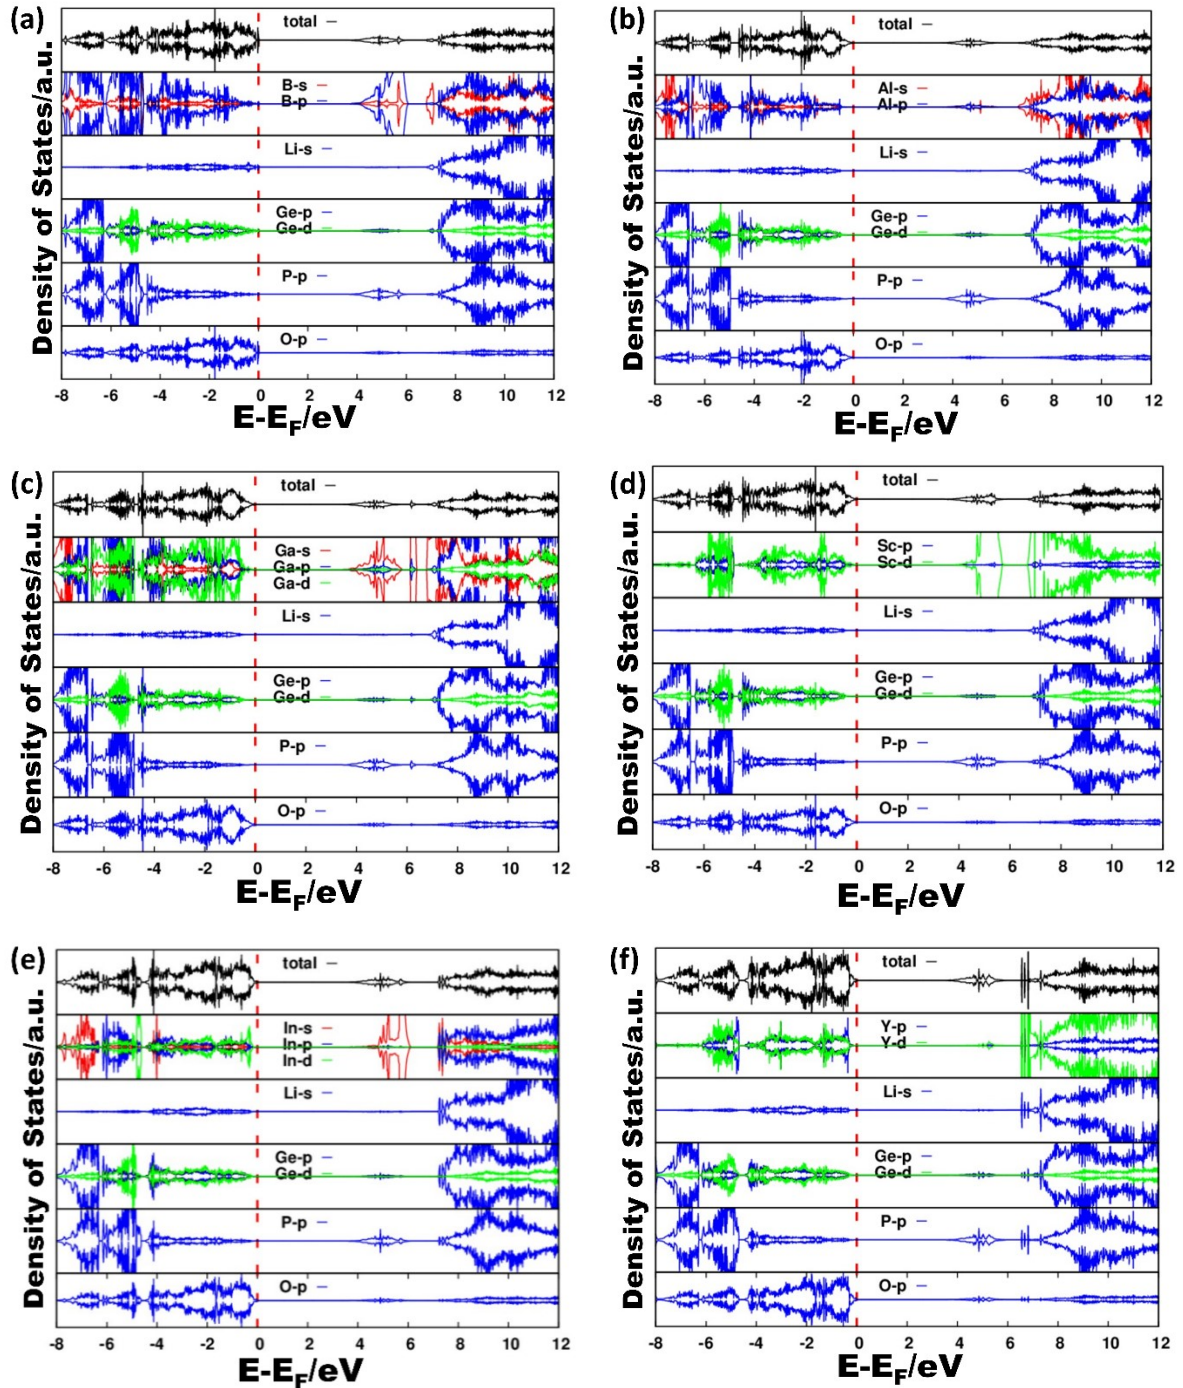

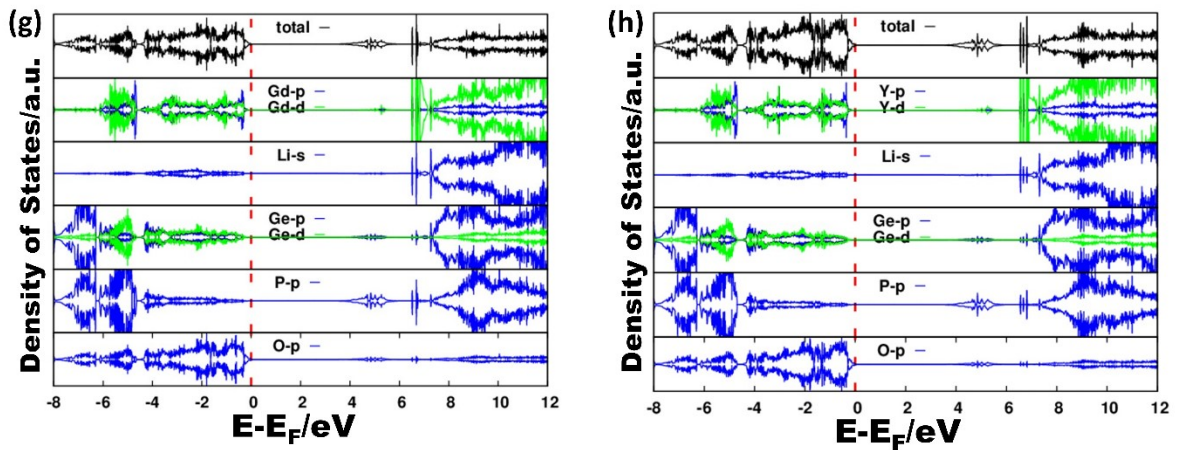

Fig. S15: Total and atom-projected partial density of states (DOS) for (a)  $B^{3+}$ , (b)  $Al^{3+}$ , (c)  $Ga^{3+}$ , (d)  $Sc^{3+}$ , (e)  $In^{3+}$ , (f)  $Y^{3+}$ , (g)  $Gd^{3+}$  and (h)  $La^{3+}$

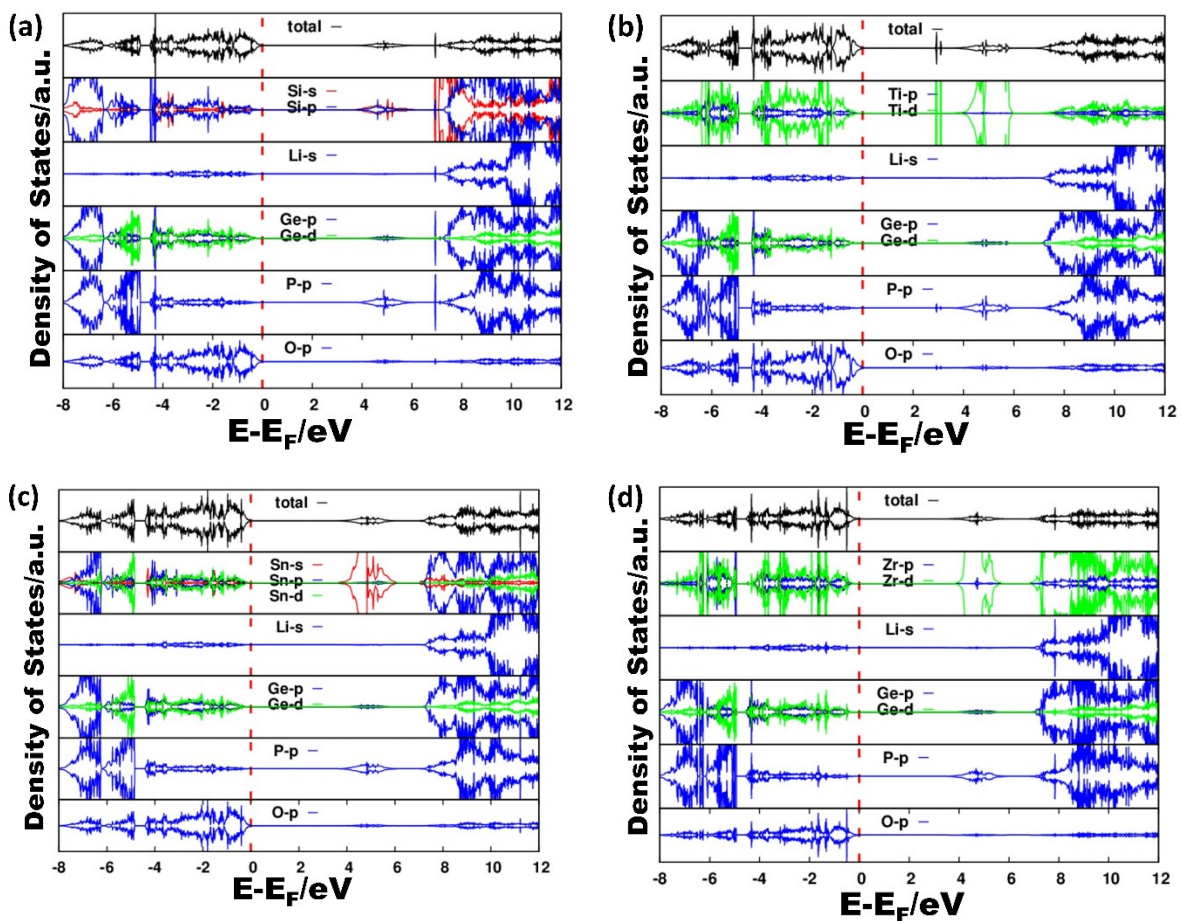

Fig. S16: Total and atom-projected partial density of states (DOS) for (a)  $Si^{4+}$ , (b)  $Ti^{4+}$ , (c)  $Sn^{4+}$  and (d)  $Zr^{4+}$

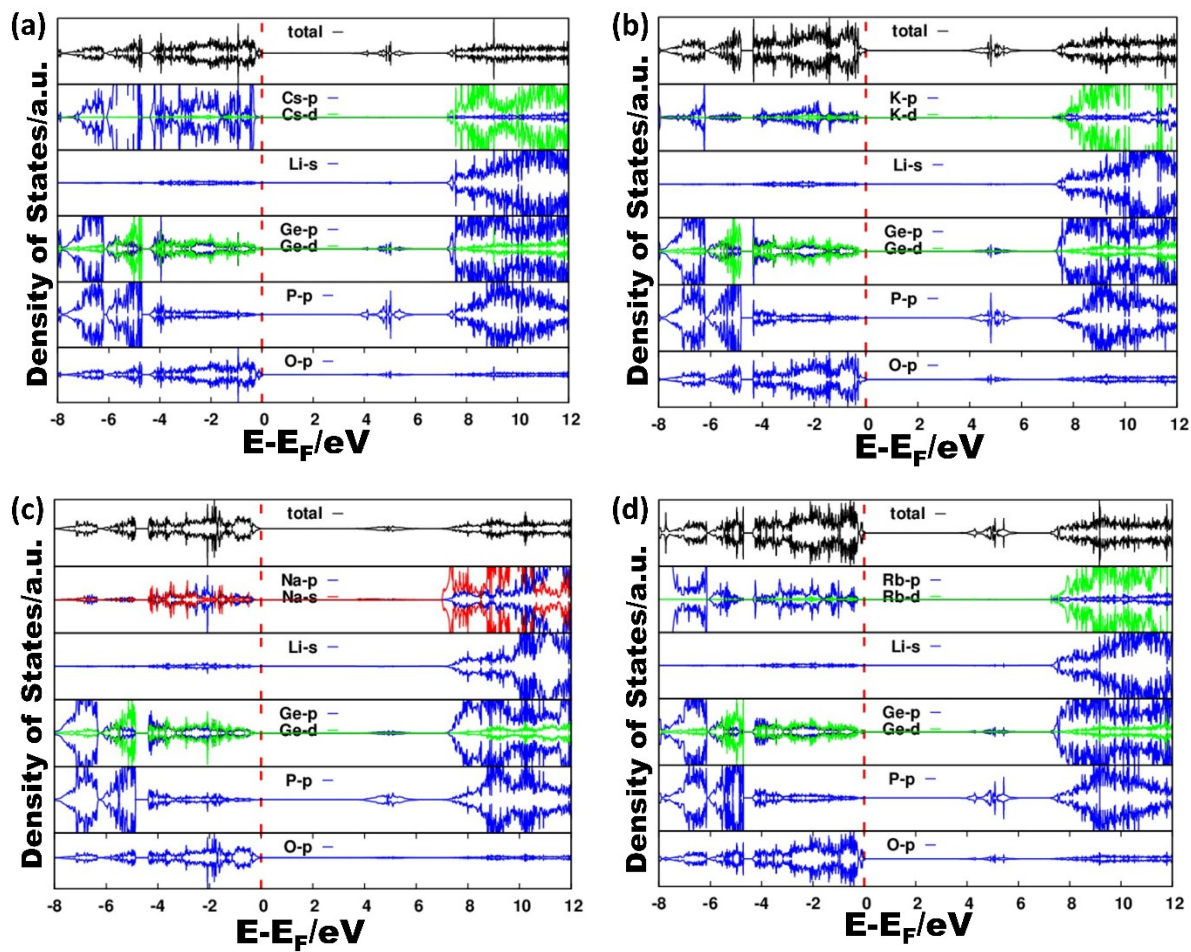

Fig. SI7: Total and atom-projected partial density of states (DOS) for (a) Cs<sup>+</sup>, (b) K<sup>+</sup>, (c) Na<sup>+</sup> and (d) Rb<sup>+</sup>

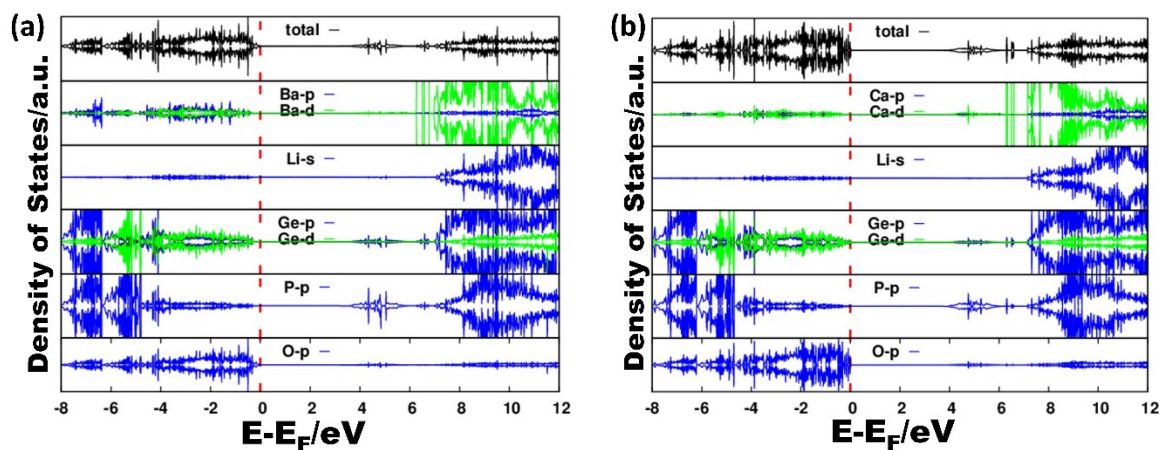

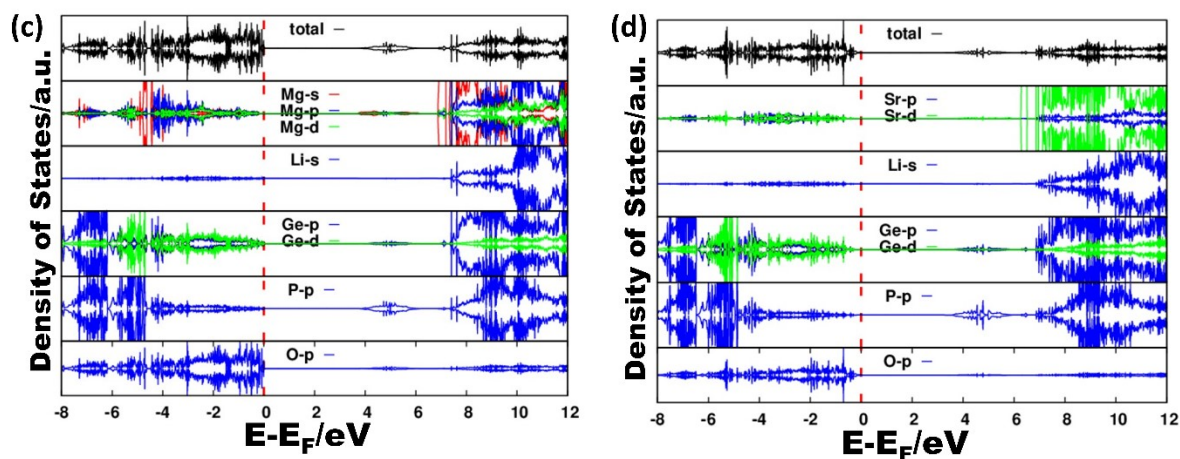

Fig. SI8: Total and atom-projected partial density of states (DOS) for (a)  $\text{Ba}^{2+}$ , (b)  $\text{Ca}^{2+}$ , (c)  $\text{Mg}^{2+}$  and (d)  $\text{Sr}^{2+}$

## References

- [1] Y. Kim, *Phys. Chem. Chem. Phys.*, 2019, **21**, 24139.
- [2] Z. Lu, C. Chen, Z.M. Baiyee, X. Chen, C. Niu, F. Ciucci, *Phys. Chem. Chem. Phys.*, 2015, **17**, 32547.
- [3] R. Sukumar, P. Iyngaran, N. Kuganathan, *Biointerface Res. Appl. Chem.*, 2021, **11**, 13268.
- [4] N. Kuganathan, K.A. Rex, P. Iyngaran, *Sustain. Chem.*, 2022, **3**, 404.
- [5] N. Kuganathan, M.J.D. Rushton, R.W. Grimes, J.A. Kilner, E.I. Gkanas, A. Chronos, *Sci. Rep.*, 2021, **11**, 451.
- [6] M.S. Islam, C.A. J. Fisher, *Chem. Soc. Rev.*, 2014, **43**, 185.
- [7] X. Li, J. Wang, S. Zhang, L. Sun, W. Zhang, F. Dang, H.J. Seifert, Y. Du, *ACS Omega*, 2021, **6**, 21255.
- [8] M.S. Islam, D.J. Driscoll, C.A.J. Fisher, P.R. Slater, *Chem. Mater.*, 2005, **17**, 5085.
- [9] C.A. J. Fisher, V.M.H. Prieto, M.S. Islam, *Chem. Mater.*, 2008, **20**, 5907.
- [10] J.M. Clark, S. Nishimura, A. Yamada, M.S. Islam, *Angew. Chem. Int. Ed.*, 2012, **51**, 1.
